# Supplementary material
Source: PubMed Central journal article supplement (PMC6093249)

## Supplementary Information

**Fig S1a.** Schematic showing TREM family genes on human chromosome 6p21 (top) and mouse chromosome 17B3 (bottom). TREM genes are shown in black boxes and TREM-like genes in open boxes. Domains of each protein are shown below the corresponding gene. b and c.

Schematic of gene-editing design for mouse TREM2 knockout and R47H knock-in and targeted sequence (top strain) in exon 2. Primer binding sites are highlighted in green in both wild type (WT) and 143-mer single-stranded oligodeoxynucleotides (ssODN) sequence for R47H (nucleotides substitutions highlighted in yellow). Knockouts were generated from 5-bp and 11-bp frame-shift deletions whereas knock-in resulted from the presence of ssODN. Silent mutations (in red letters) were also introduced to prevent cutting as well as to create MluI restriction site for genotyping R47H. Virtual gel of PCR products from wild type (128 bp) and knockout (only 5-bp deletion are shown) mice genomic DNA (left), and PCR products digested with MluI (139 and 100 bp) from R47H knock-in mice (right);

**Fig S2a and b.** TREM2<sup>R47H</sup> (a) and TREM2<sup>-/-</sup> (b) mouse bone marrow derived macrophages (BMDMs) exhibit a survival defect when cultured under limiting conditions of CSF-1. This effect is less pronounced in heterozygous TREM2<sup>+/-</sup> and TREM2<sup>R47H/+</sup> BMDMs supportive of a gene-dosage effect on survival.

**Fig S3a and b.** A significant increase in *Ccl5* was noted on multiple days in both R47H (day 6 and 7, dark blue hash, n=3) and knockout macrophages (days 5, 6 and 7, red hash). A significant increase on days 6 and 7 in the heterozygous knockouts (pink dots) was also noted; c and d. Significant increase of *Ccl22* in R47H macrophages on day 7 and on days 5, 6 and 7 compared to wild-type. n=4 animals for R47H macrophages, n = 3 for WT and heterozygous littermates; n= 2

for knockout and WT litter-mates, n=3 for heterozygous littermates; e and f; No significant changes in *Flt1* in the R47H macrophages, however, significant reductions were observed in the knockout macrophages on days 6 and 7; g. Migration defects were noted for knockout BMDMs in a plug area assay. \* p<0.05, \*\*p<0.01, \*\*\*p<0.001 and \*\*\*\*p<.0001, 2-way ANOVA with Dunnett's correction for multiple comparisons

**Fig S4a-b.** Significant reduction in CCL3 (a) and CCL4 (b) levels in TREM2<sup>R47H</sup> microglia following treatment with Abeta 1-42 (blue hash), compared to wildtype littermates (black outline); c. Reduction in CCL2 from peritoneal lavage of TREM2<sup>-/-</sup>, 3.5 hours post treatment with Zymosan; d. Reduction in CCL2 in the TREM2<sup>-/-</sup> brains treated with LPS 24 hours post treatment does not reach statistical significance.

**Fig S5a.** Surface expression of TREM2 in bone-marrow derived macrophages (BMDMs) cultured from TREM2<sup>+/+</sup> (green) and TREM2<sup>R47H</sup> (blue) mice measured by FACS analysis using antibody 1 conjugated to APC reveals similar levels of surface TREM2 expression in the variant as WT TREM2; b. Antibody 1 does not detect any surface TREM2 in BMDMs from TREM2<sup>-/-</sup> mice (red) while demonstrating a FACS shift with WT BMDMs (green); c. Surface expression of TREM2 in bone-marrow derived macrophages (BMDMs) cultured from TREM2<sup>+/+</sup> (green) and TREM2<sup>R47H</sup> (blue) mice measured by FACS analysis using antibody 2 reveals similar levels of surface TREM2 expression in the variant as WT TREM2; d. Antibody 2 does not detect any surface TREM2 in BMDMs from TREM2<sup>-/-</sup> mice (red) while detecting a FACS shift with WT BMDMs (purple). Background staining with the corresponding isotype control is shown in dotted black; e. An immunoblot of lysate from BMDMs confirms the specificity of antibody 2.

There are no bands detected in TREM2<sup>-/-</sup> BMDMs (lanes 1 and 2) but bands corresponding to different glycosylated forms of TREM2 in TREM2<sup>R47H</sup> and TREM2<sup>+/+</sup> BMDMs are detected by antibody 2.

**Fig S6a** and b. Antibody 1 boosts survival of TREM2<sup>+/+</sup> (green) macrophages and microglia as demonstrated in a real-time cell confluence assay. Isotype control antibody (blue) is not able to achieve the same boost in survival; c. Antibody 1 was not able to rescue the survival defect observed in TREM2<sup>-/-</sup> macrophages; d and e. Antibody 2 boosts survival of TREM2<sup>+/+</sup> macrophages (d, purple) and a trend towards boosting microglia survival (e, purple) as demonstrated in a real-time cell confluence assay. Isotype control antibody (blue) is not able to achieve the same boost in survival; f. Antibody 2 was not able to improve the survival defect observed in TREM2<sup>-/-</sup> macrophages. Data are plotted as mean +/- s.d. and are from a single representative experiment. The experiment was conducted twice independently.

**Fig S7a.** Antibody 1 treatment increases the levels of *Ccl2* in BMDMs derived from R47H macrophages at day 5 only; b. Antibody 1 treatment increases CCL2 at the protein level as well; c-e. Antibody 1 causes a significant reduction in *Melk* (c), *Nek2* (d) and *Mmp14* (e) levels in TREM2<sup>R47H</sup> macrophages compared to isotype control. No significant changes were observed in WT macrophages. \* p<0.05, \*\*p < 0.01, \*\*\*p < 0.001 and \*\*\*\*p<.0001, 2-way ANOVA with Sidak's correction for multiple comparisons

**Figure S1**

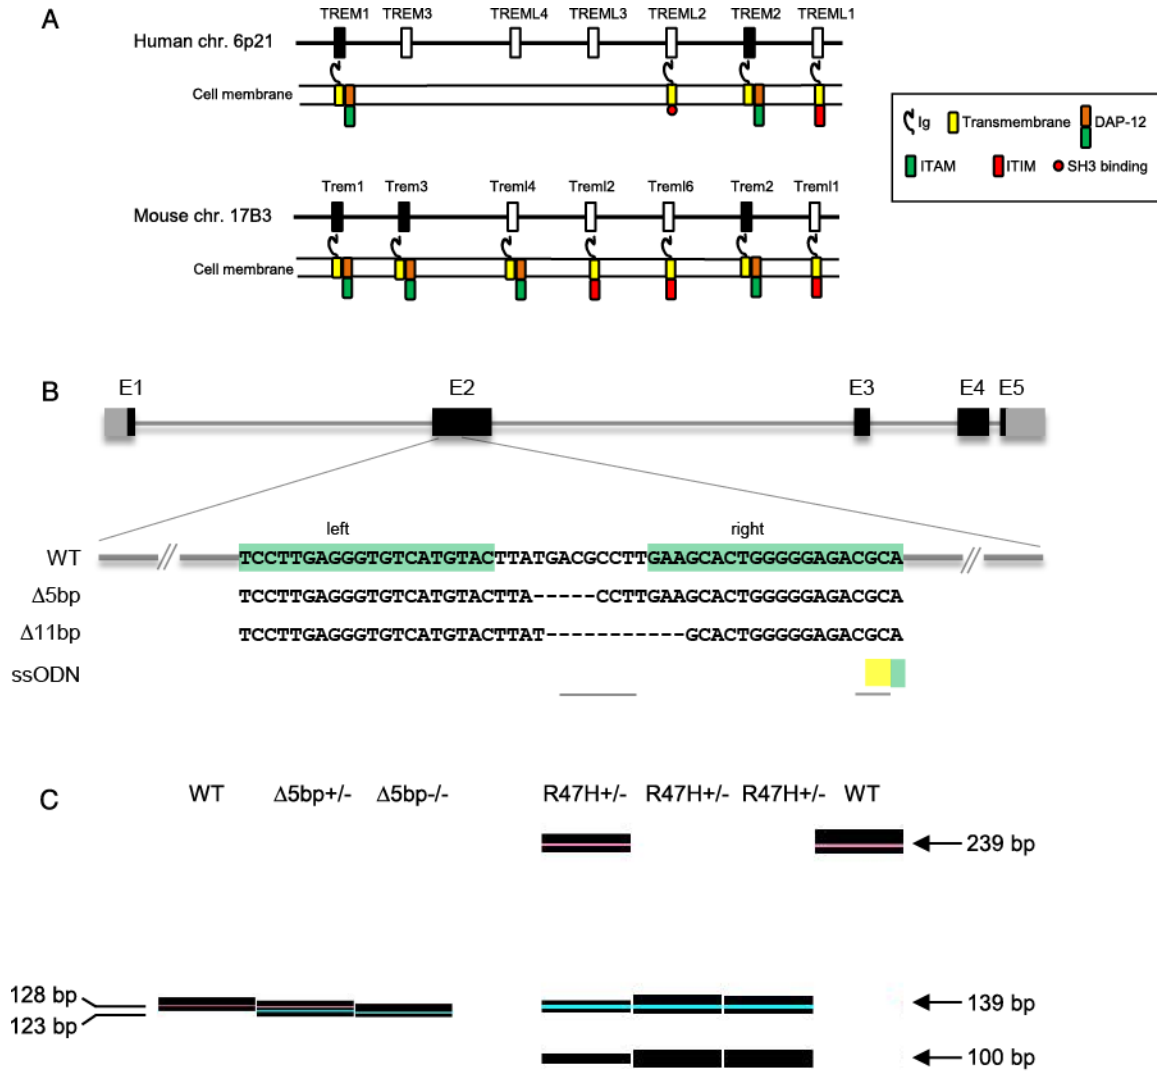

**Figure S2**

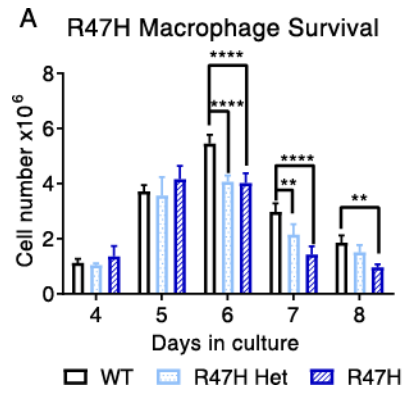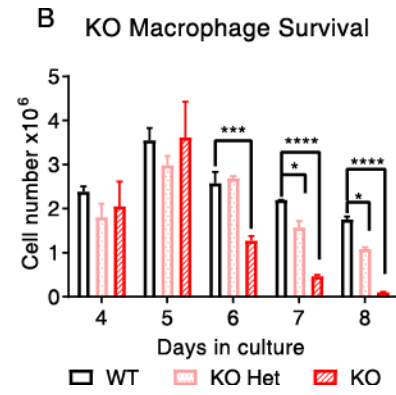

**Figure S3**

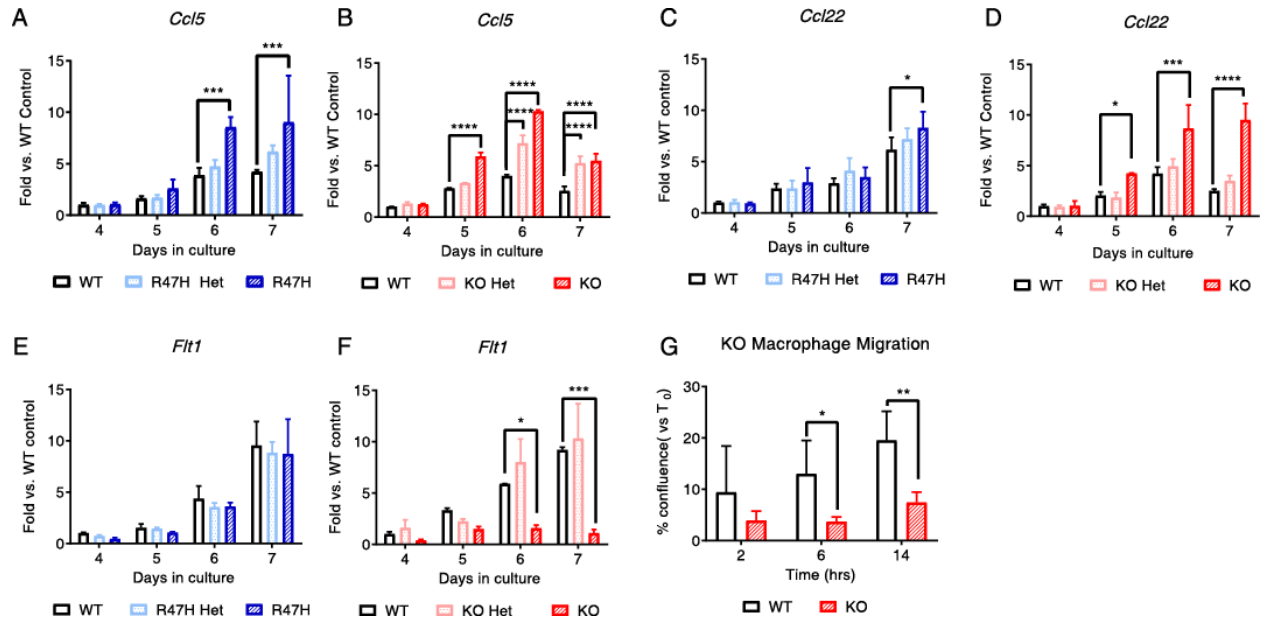

**Figure S4**

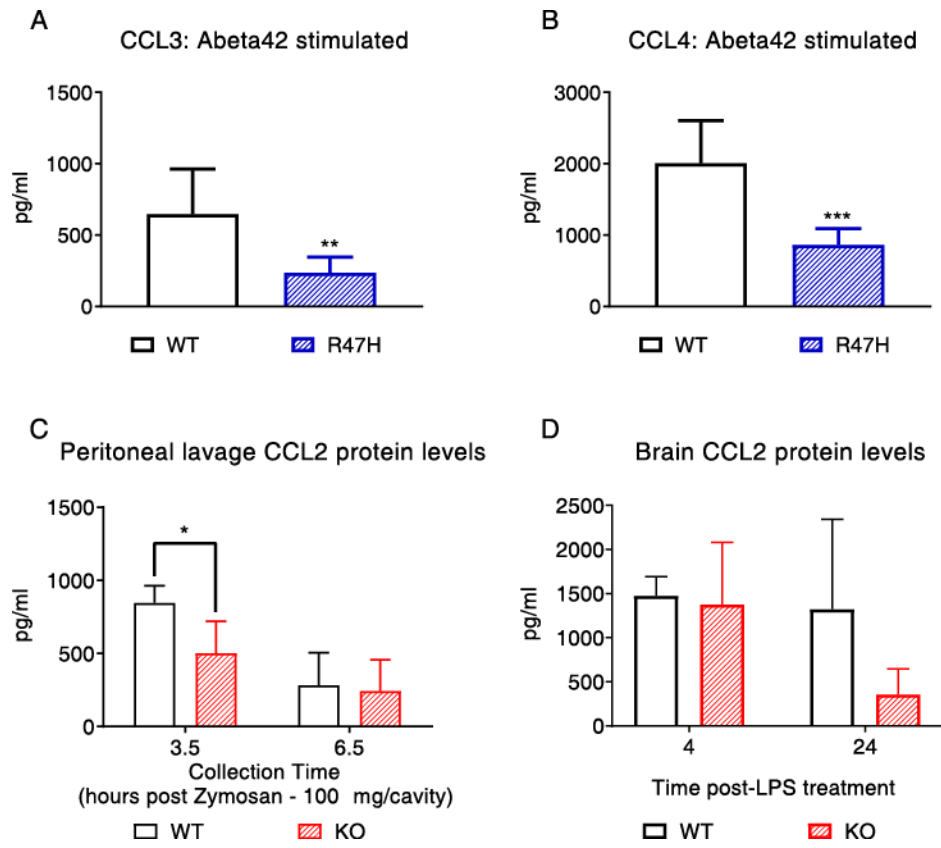

**Figure S5**

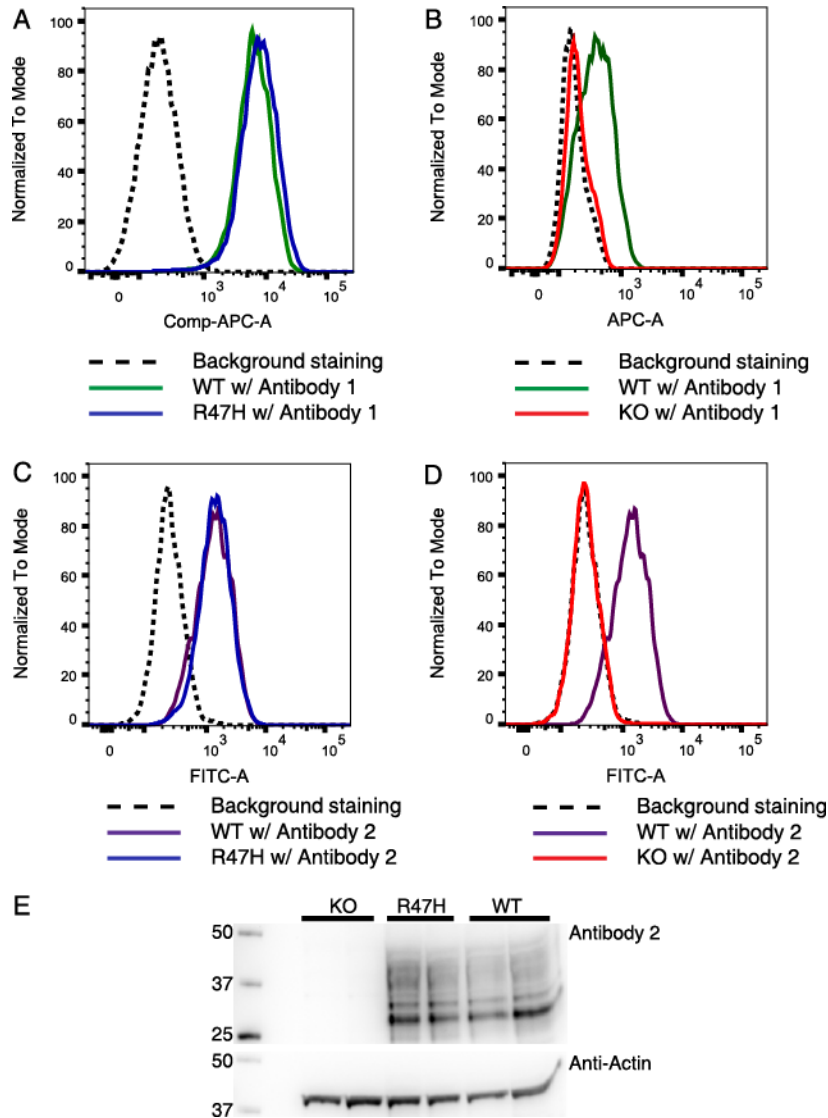



**Figure S6**

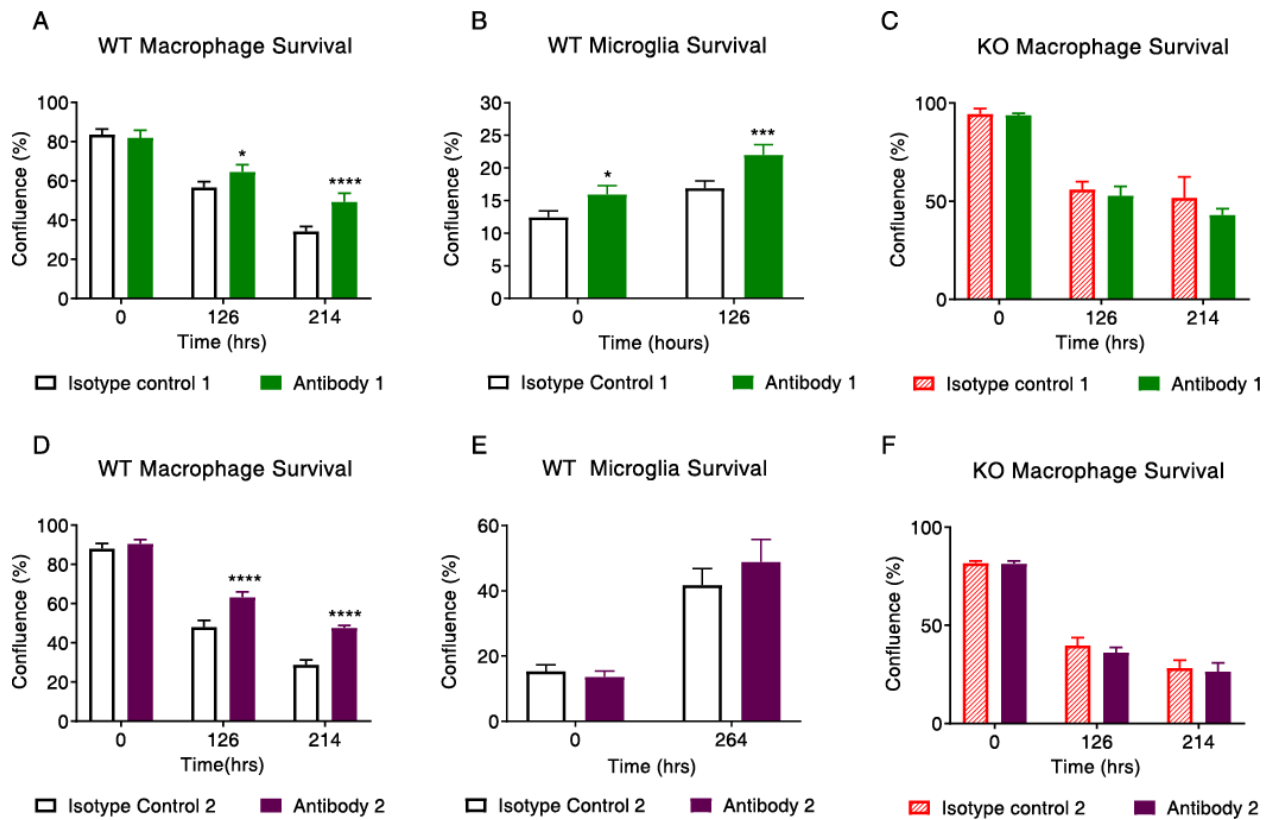

**Figure S7**

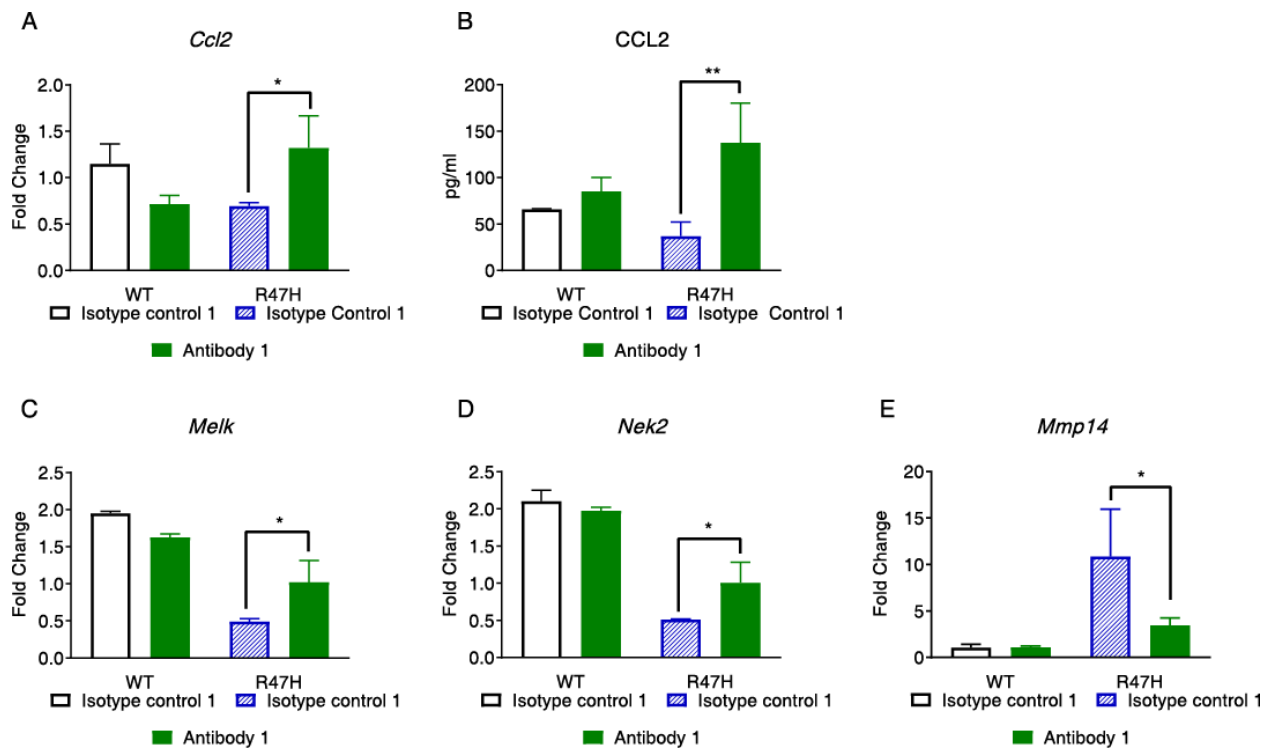

Supplement: supp_RA118.001848_135215_2_supp_100951_p62d0d.pdf [file supp_RA118.001848_135215_2_supp_100951_p62d0d.pdf]
